# Supplementary material for: Effects of tetrahedral molybdenum oxide species and MoOx domains on the selective oxidation of dimethyl ether under mild conditions
Source: Royal Society of Chemistry journal article supplement (doi:10.1039/c5cy01569c), 2015-11-12
Supplement: c5cy01569c1.pdf [file c5cy01569c1.pdf]

## Supporting Information Materials

**Table S1** Total pore volume and BET surface of MoO<sub>3</sub>-SnO<sub>2</sub> with different calcination temperature

| Calcination temperature (K) | S <sub>BET</sub> (m <sup>2</sup> /g) | V (cm <sup>3</sup> /g) |
|-----------------------------|--------------------------------------|------------------------|
| 473                         | 9.3                                  | 0.0127                 |
| 573                         | 3.6                                  | 0.0089                 |
| 673                         | 10.3                                 | 0.0356                 |
| 773                         | 10                                   | 0.0363                 |
| 873                         | 4.2                                  | 0.0175                 |
| 973                         | 5.5                                  | 0.0168                 |
| 1073                        | 6.7                                  | 0.0244                 |

**Table S2** Total pore volume and BET surface of MoO<sub>3</sub>-SnO<sub>2</sub> with different SnO<sub>2</sub> contents

| Sn/(Mo+Sn) | S <sub>BET</sub> (m <sup>2</sup> /g) | V (cm <sup>3</sup> /g) |
|------------|--------------------------------------|------------------------|
| 0.00       | 1.097                                | 0.000037               |
| 0.25       | 9.960                                | 0.000792               |
| 0.33       | 19.600                               | 0.000852               |
| 0.50       | 21.700                               | 0.003720               |
| 0.67       | 123.850                              | 0.018200               |
| 0.75       | 153.825                              | 0.013000               |
| 1.00       | 50.960                               | 0.001860               |

**Fig S1** In situ IR pulsed reaction of dimethyl ether to methyl ether over Mo1Sn2 at 343 K

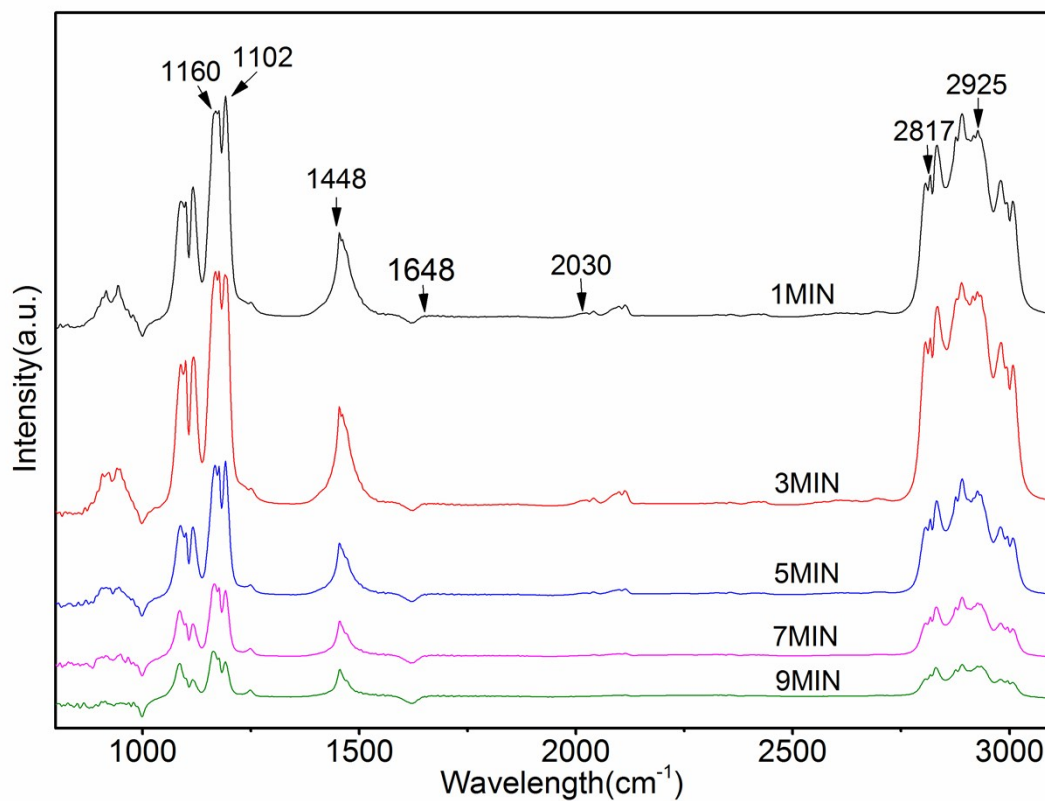

**Fig S2** In situ IR pulsed reaction of dimethyl ether to methyl ether over Mo<sub>1</sub>Sn<sub>2</sub> at 433 K

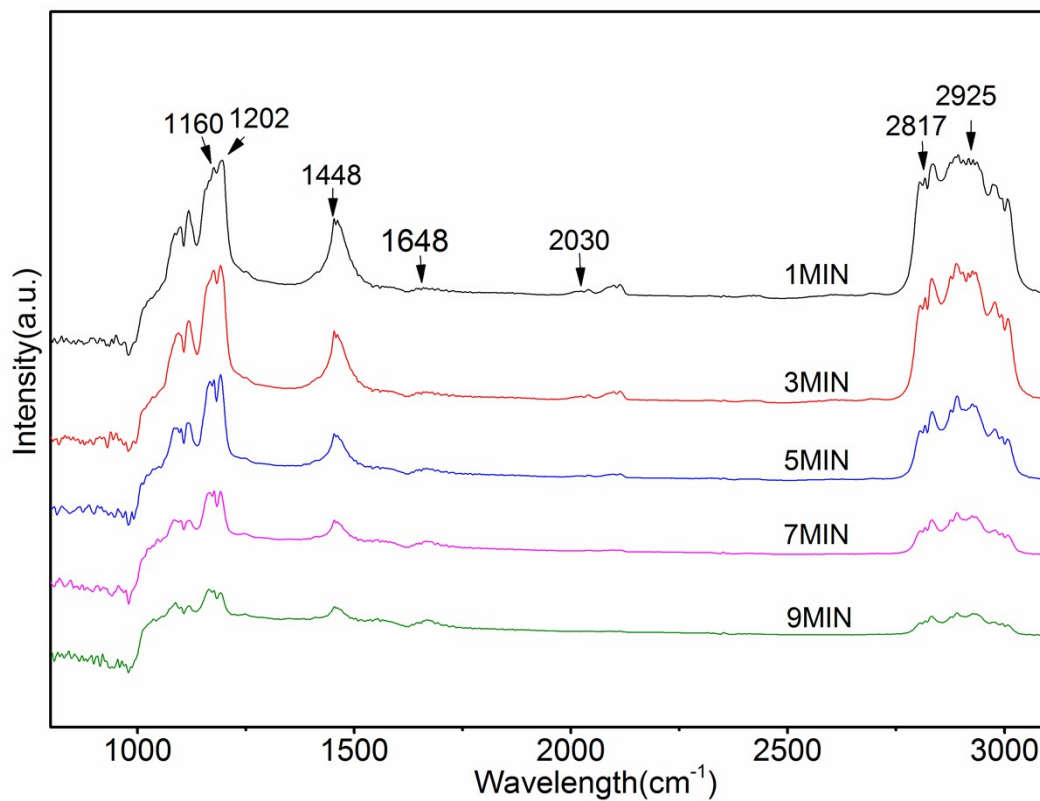

**Fig S3** In situ IR pulsed reaction of dimethyl ether to methyl ether over Mo<sub>1</sub>Sn<sub>2</sub> at 473 K

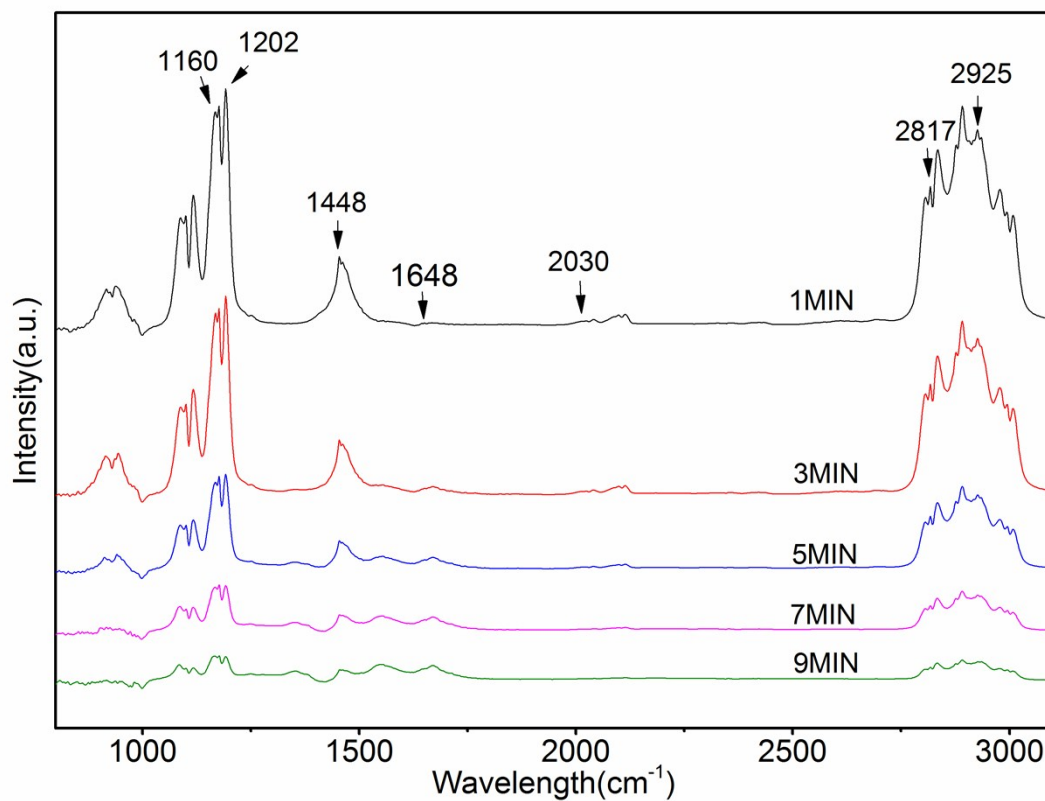

**Fig S4** In situ IR pulsed reaction of dimethyl ether to methyl ether over Mo<sub>1</sub>Sn<sub>2</sub> at 573K

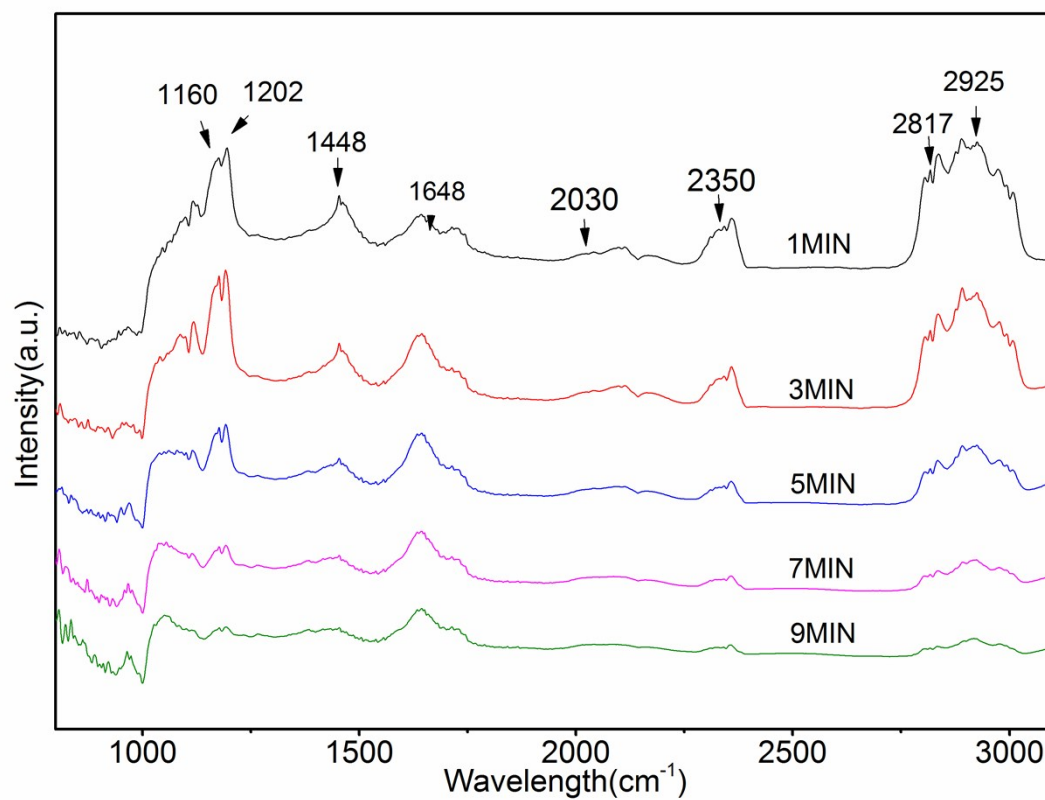

**Fig S5** H<sub>2</sub>-TPR profiles of MoO<sub>3</sub>-SnO<sub>2</sub> with different SnO<sub>2</sub> contents

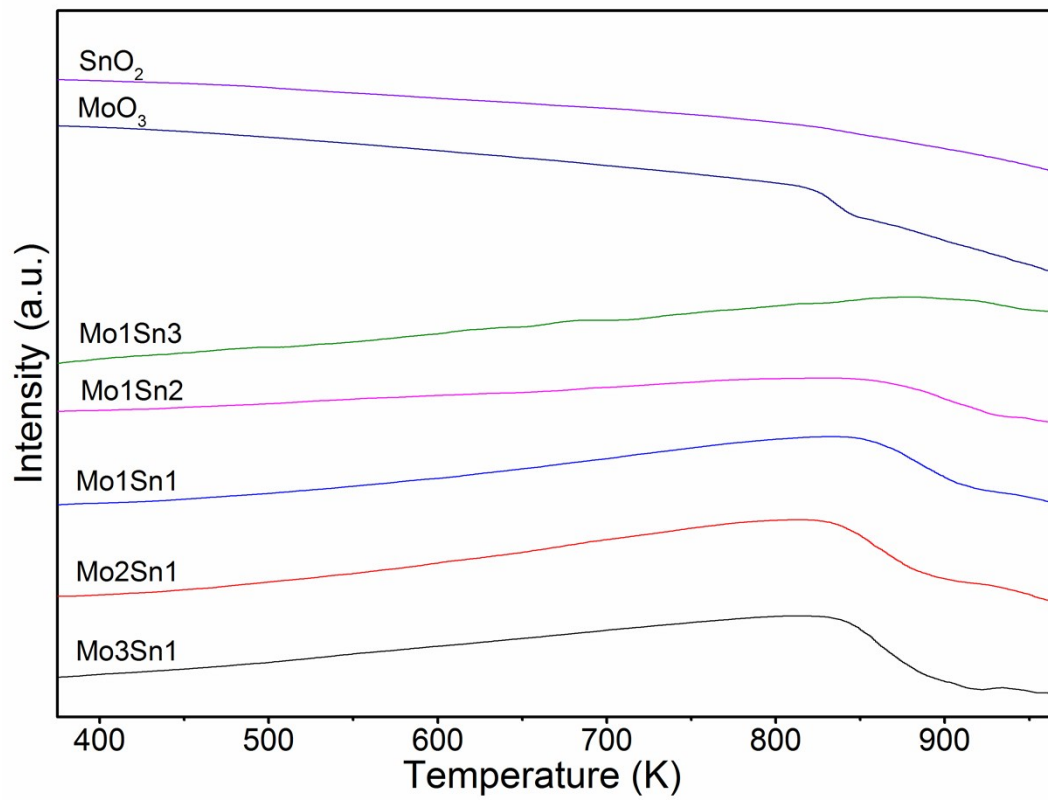

**Fig S6** HRTEM images of Mo1Sn3

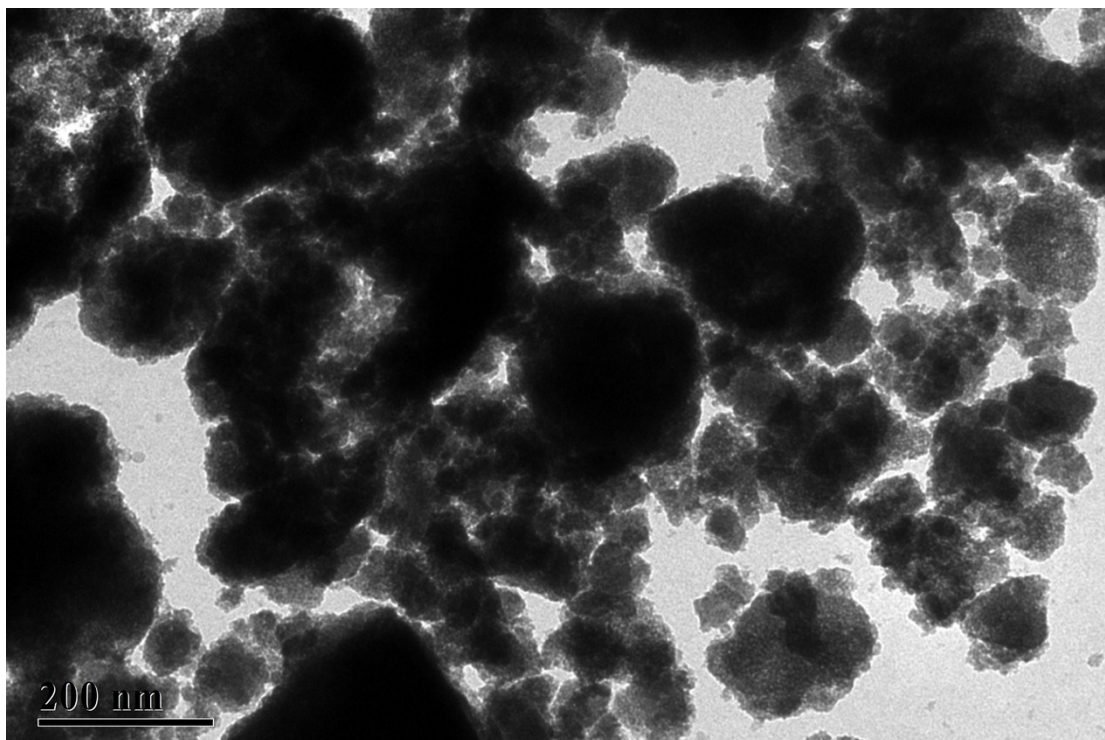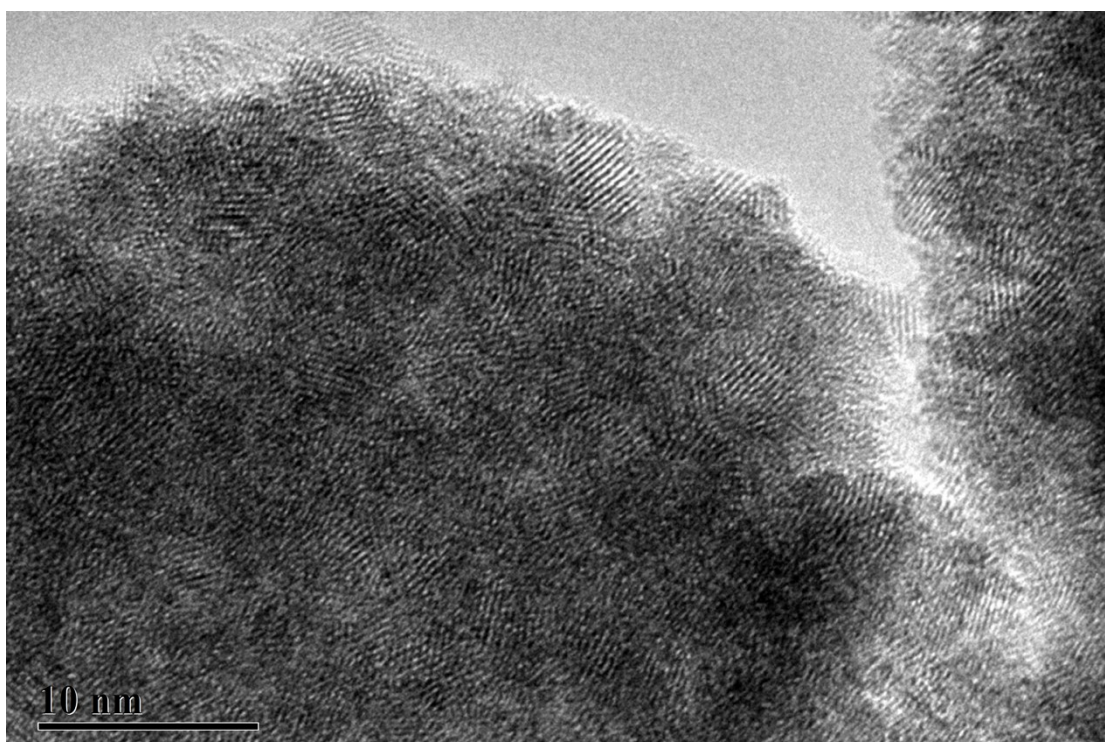

**Fig S7** STEM-EDX images of Mo<sub>1</sub>Sn<sub>3</sub>

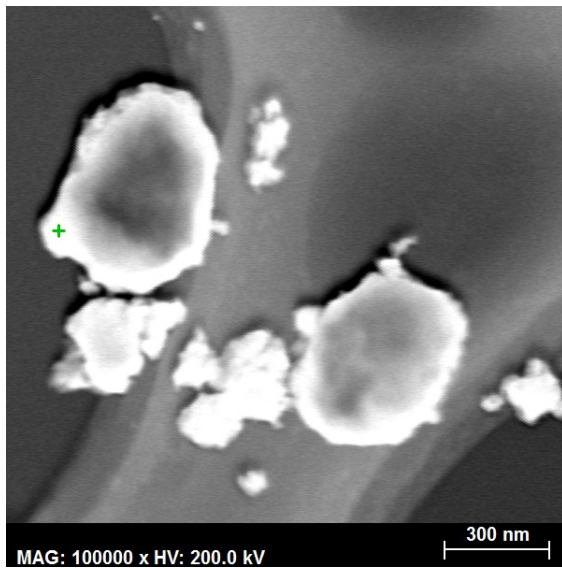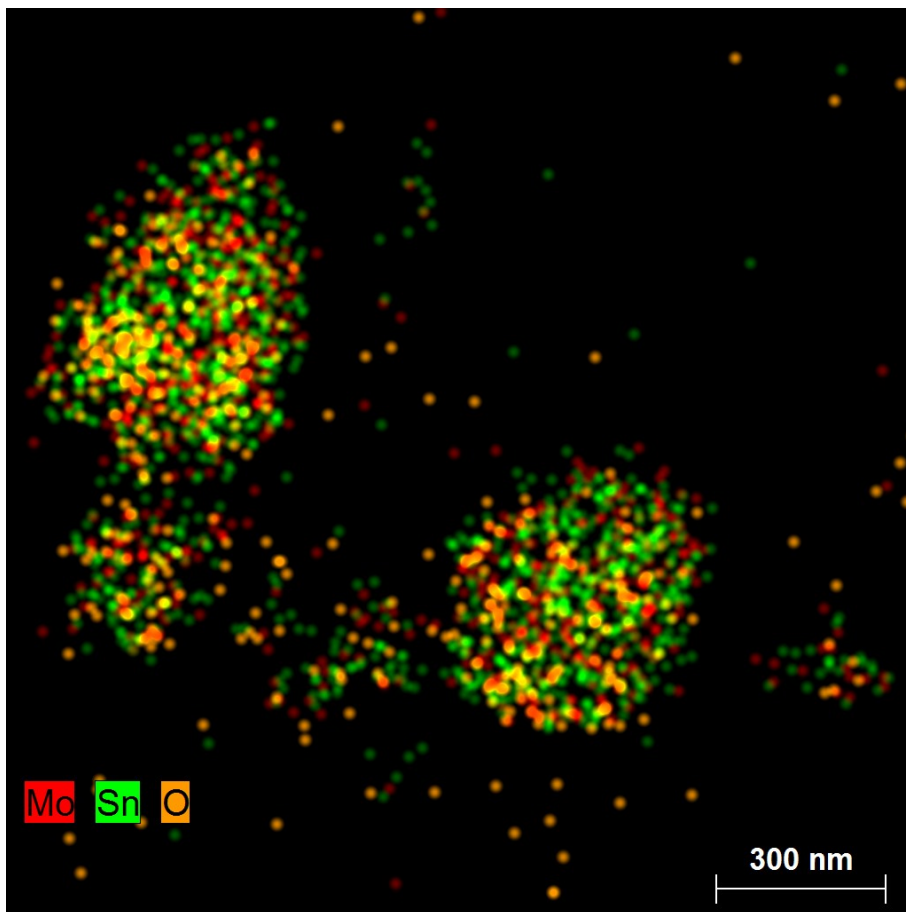

**Table S3** The ratio of Mo to Sn of Mo<sub>1</sub>Sn<sub>3</sub>

| Method       | Mo/Sn atomic ratio |
|--------------|--------------------|
| Theory value | 0.33               |
| EDX          | 0.34               |
| XPS          | 0.38               |

**Simplified kinetics analysis of the selective oxidation of dimethyl ether to methyl formate**

## over MoO<sub>3</sub>-SnO<sub>2</sub>

### 1. Elimination of mass transfer resistances.

**Table S4 Gas-Solid Internal Diffusion Effects**

|                     |      |      |      |
|---------------------|------|------|------|
| Feed rate ( mL/min) | 16   | 24   | 32   |
| conversion          | 17.4 | 17.0 | 18.3 |

Reaction conditions: DME/O<sub>2</sub>=1:1, MoO<sub>3</sub>/SnO<sub>2</sub>=1:2, T<sub>R</sub>=403 K, W/V=0.0625 g·min/mL, C<sub>0</sub>=0.0223 mol/L.

**Table S5 Gas-Solid External Diffusion Effects**

|                     |           |           |       |
|---------------------|-----------|-----------|-------|
| D <sub>p</sub> (mm) | 0.90-0.45 | 0.45-0.36 | <0.36 |
| conversion          | 17.4      | 17.6      | 18.5  |

Reaction conditions: DME/O<sub>2</sub>=1:1, MoO<sub>3</sub>/SnO<sub>2</sub>=1:2, T<sub>R</sub>=403 K, W=2 g, V=16 mL/min.

The effects of gas-solid external and internal diffusion are shown in Table S4 and Table S5. Under the same retention time, when the conversions of reactant did not change along with the feed rates, the gas-solid external diffusion mass transfer resistance could be neglected. Table S4 showed conversion of the same retention time with different feed rates. It was easy to come to the conclusion that the conversion of dimethyl ether did not change obviously and the gas-solid external diffusion could be neglected when the feed rate was faster than 16 mL/min. When conversions of the reactant did not change along with the diameter of the catalyst particle, the gas-solid internal diffusion mass transfer resistances could be neglected. Table S2 showed that the conversions of dimethyl ether did not change obviously when the diameter of the catalyst particle was not larger than 0.90 mm. As a result, the internal mass transfer resistances were negligible in this simplified model.

### 2. Intrinsic Kinetic Model.

The overall selective oxidation of dimethyl ether to methyl formate over MoO<sub>3</sub>-SnO<sub>2</sub> can be represented as equation 1.

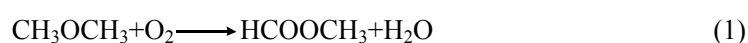

The intrinsic kinetic experiments were conducted in the absence of mass transfer resistances.

The reaction rate of selective oxidation of dimethyl ether to methyl formate is defined as



equation 2.

$$r_p = - \frac{dF_p}{dw} = - \frac{dx}{F_{p0} dW} = \text{Error!} \quad (2)$$

The possible reaction pathway in Scheme 1 was used to derive a rate equation for the selective oxidation reaction from dimethyl ether to methyl formate. According to this model, the reaction consisted of several steps: the adsorption of dimethyl ether and O<sub>2</sub>, a series of surface reaction and desorption of methyl formate. Equation 1 describes the overall reaction of dimethyl ether and O<sub>2</sub> to form methyl formate. The elemental steps of the overall reaction are assumed in equations 3-8. At first, dimethyl ether was adsorbed on the surface of molybdenum oxide. O<sub>2</sub> was also adsorbed on the surface of the catalyst. Then dimethyl ether was dissociated and activated intermediate CH<sub>3</sub>O • \* [Mo] was formed with the assistance of the activated [O] species. Next CH<sub>3</sub>O • \* [Mo] reacted with [O] to produce HCHO\* [Mo]. Finally, methyl formate was formed and desorbed from the surface of the catalyst.

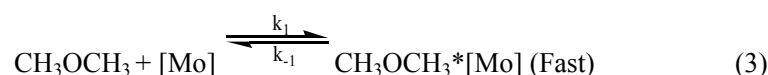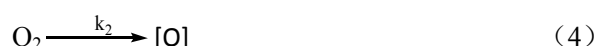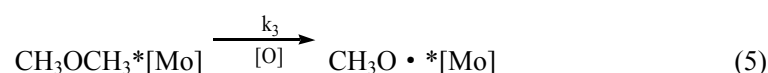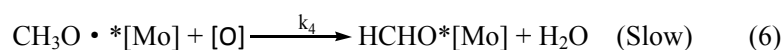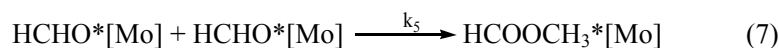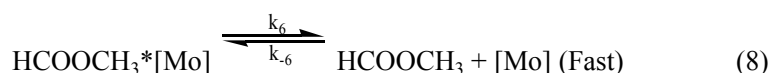

It was assumed that the equation 6 was the rate-determining step, equation 3 and 8 were assumed to be fast reaction and be equilibrium states, CH<sub>3</sub>O • \* [Mo] was assumed to be activated intermediates, and the concentration of [O] was assumed to be constant, therefore, equations 9-11 were obtained.

$$r_p = k_4[\text{CH}_3\text{O} \cdot ^*[\text{Mo}]][\text{O}] \quad (9)$$

$$\frac{d[\text{CH}_3\text{O} \cdot ^*[\text{Mo}]]}{dt} = k_3[\text{CH}_3\text{OCH}_3^*[\text{Mo}]] - k_4[\text{CH}_3\text{O} \cdot ^*[\text{Mo}]][\text{O}] = 0 \quad (10)$$

$$\frac{k_1}{k_{-1}} \frac{[\text{CH}_3\text{OCH}_3^*[\text{Mo}]]}{[\text{CH}_3\text{OCH}_3]} = 1 \quad (11)$$

Finally, equation 12 was derived to be the rate equation of the overall reaction after a reasonable mathematical procedure. Combine equation 2 and equation 12, and use the initial condition (x<sub>0</sub>=0, W<sub>0</sub>=0), equation 13 is obtained.

$$r_p = \frac{k_1 k_3}{k_2 - 1} [\text{CH}_3\text{OCH}_3] = k C_0 [\text{CH}_3\text{OCH}_3] = k C_0 (1-x) \quad (12)$$

$$-\ln(1-x) = k C_0 \frac{W}{F P_0} \quad (13)$$

**Table S6 Intrinsic Kinetic Data**

| W(g)                                                             | 2     | 3     | 4     |
|------------------------------------------------------------------|-------|-------|-------|
| x                                                                | 0.174 | 0.215 | 0.367 |
| W/F <sub>P0</sub> (× 10 <sup>3</sup> , min g mol <sup>-1</sup> ) | 5.6   | 8.4   | 11.2  |
| -ln(1-x)                                                         | 0.191 | 0.242 | 0.457 |

Reaction conditions: DME/O<sub>2</sub>=1:1, MoO<sub>3</sub>/SnO<sub>2</sub>=1:2, T<sub>R</sub>=403 K, C<sub>0</sub>=0.0223 mol/L, V =16 mL/min.

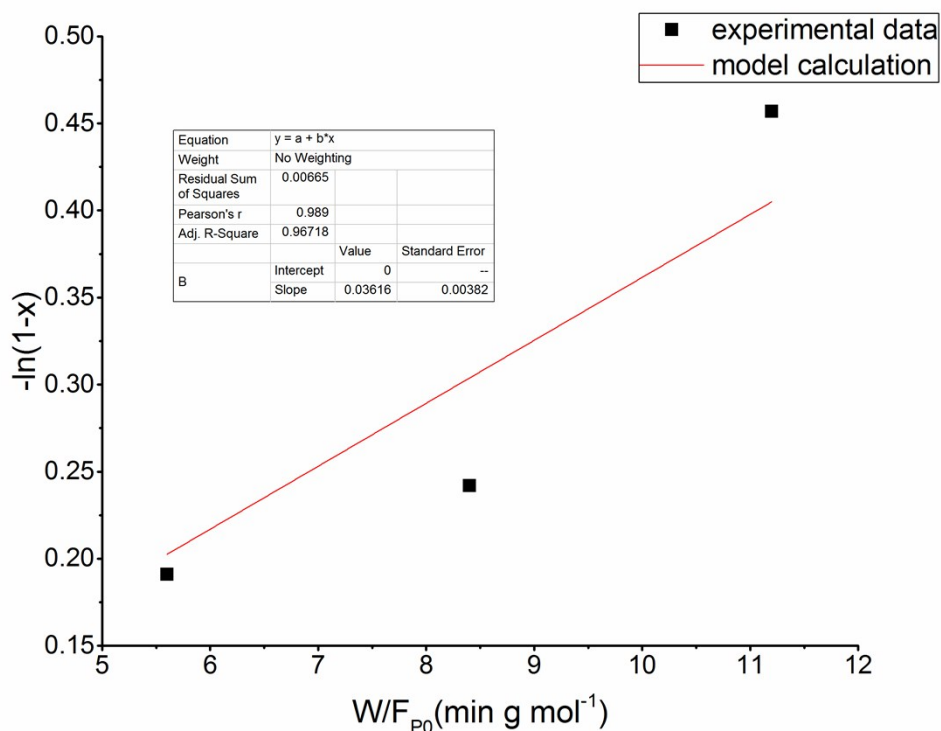

Fig. S8 Experimental data and model calculation of kinetics

(DME/O<sub>2</sub>=1:1, MoO<sub>3</sub>/SnO<sub>2</sub>=1:2, T<sub>R</sub>=403 K, C<sub>0</sub>=0.0223 mol/L, V =16 mL/min).

Fig. S8 shows experimental data and model calculation of kinetics of Mo1Sn2 at 403 K. Model parameters of temperature of 393 K were also regressed, and both results are shown in Table S7. Similarly, model parameters of Mo1Sn1 were also regressed and the results are shown in Table S7.

**Table S7 Regression of Model Parameters over Mo1Sn2 under Different Temperature.**

| T (K) | k (L g <sup>-1</sup> min <sup>-1</sup> ) |
|-------|------------------------------------------|
| 393   | 0.00023                                  |
| 403   | 0.00058                                  |

Reaction conditions: DME/O<sub>2</sub>=1:1, MoO<sub>3</sub>/SnO<sub>2</sub>=1:2, C<sub>0</sub>=0.0223 mol/L, V =16 mL/min.

**Table S8 Regression of Model Parameters over Mo1Sn1 under Different Temperature.**

| T (K) | k (L g <sup>-1</sup> min <sup>-1</sup> ) |
|-------|------------------------------------------|
| 393   | 0.00007                                  |
| 403   | 0.00021                                  |

Reaction conditions: DME/O<sub>2</sub>=1:1, MoO<sub>3</sub>/SnO<sub>2</sub>=1:1, C<sub>0</sub>=0.0223 mol/L, V =16 mL/min.

The Arrhenius Law was used to analyze the kinetic data in the Table S7. The activation energy was estimated to be 120.7 kJ/mol over Mo1Sn2. Similarly, model parameters of Mo1Sn1 were regressed, and the activation energy was estimated to be 144.6 kJ/mol over Mo1Sn1.

$$k = Ae^{-E_a/RT} \quad (14)$$

$$\ln k = \ln A + \left(-\frac{E_a}{R}\right)\frac{1}{T} \quad (15)$$

Using the results of the simplified kinetics model analysis, it was easy to come to the conclusion that the formation rates of methyl formate over Mo1Sn2 was faster than that of methyl formate over Mo1Sn1, and activation energies of methyl formate over Mo1Sn2 was lower than that of methyl formate over Mo1Sn1. Based on the XRD and Raman results, the relative quantity of MoO<sub>x</sub> domains over Mo1Sn2 was obviously more than that over Mo1Sn1, which possibly had a positive connection with the faster formation rates and lower activation energies of methyl formate over Mo1Sn2.
